# Supplementary material for: Comparative analysis of fungal genomes reveals different plant cell wall degrading capacity in fungi
Source: Springer Nature journal article supplement (doi:10.1186/1471-2164-14-274), 2013-04-23

**Additional file 6. Cluster profiles of *Fusarium graminearum* CAZyme genes during infection of wheat or barley and conidium germination.** All time-series have been transformed to  $(0, v_{1-v_0}, \dots, v_{n-v_0})$  so that the time series starts at 0. The software Mayday 2.13 [50] was used to construct the k-means clustering with Pearson correlation distance measure and 9 clusters. FG1 and FG15 were expression profiles of *F. graminearum* CAZyme genes during infection of barley spikes and wheat heads, respectively. FG7 panels were expression profiles of these genes during conidium germination.

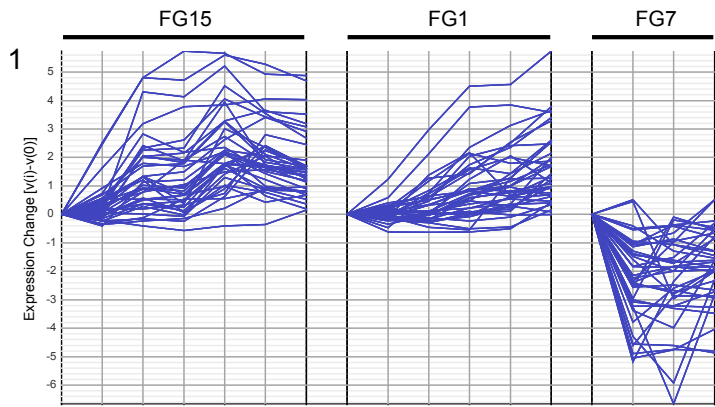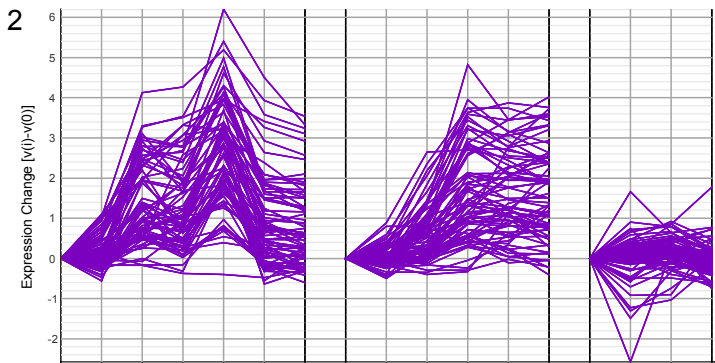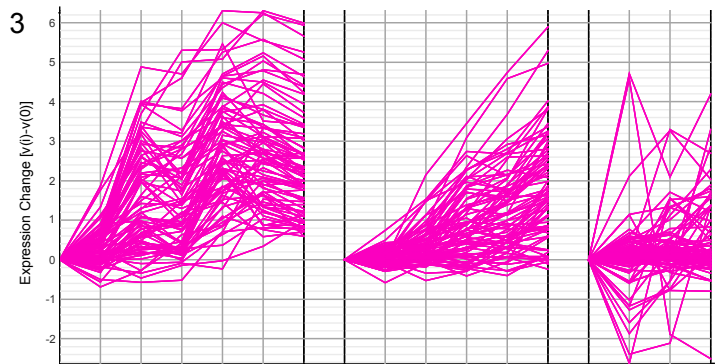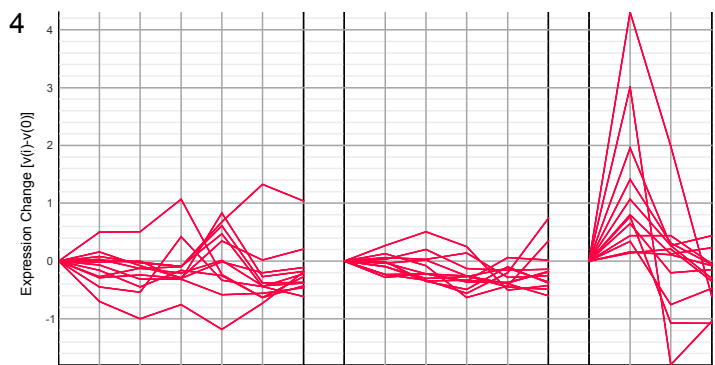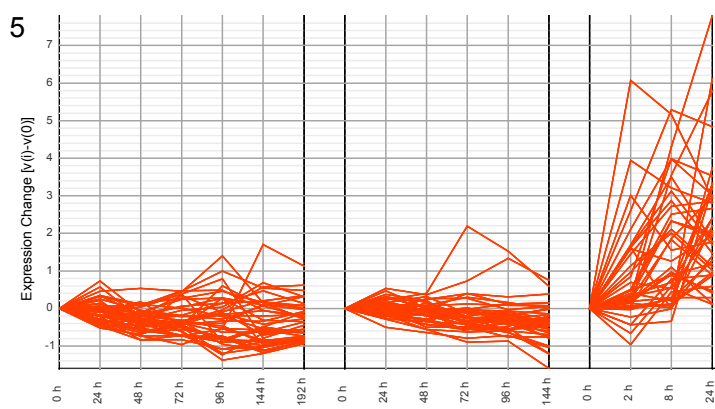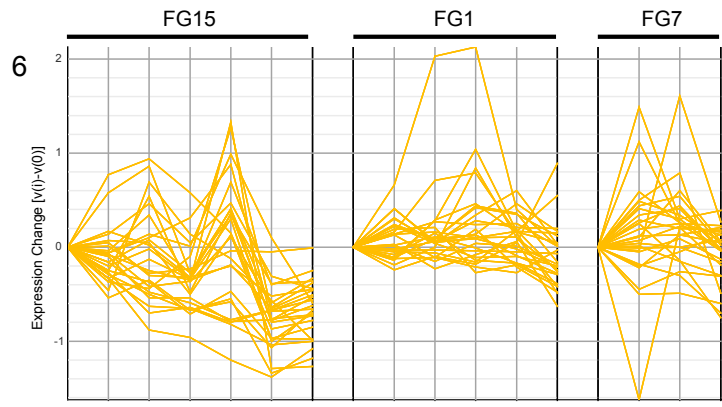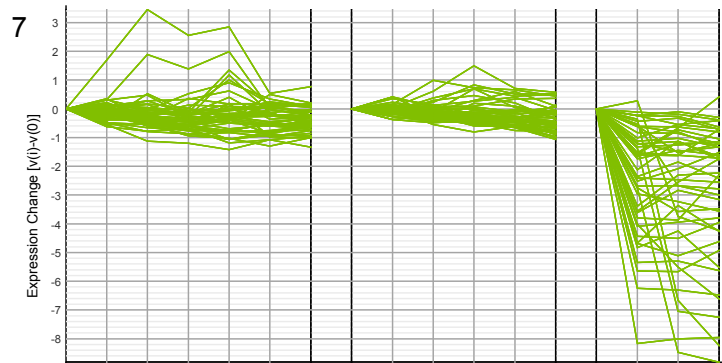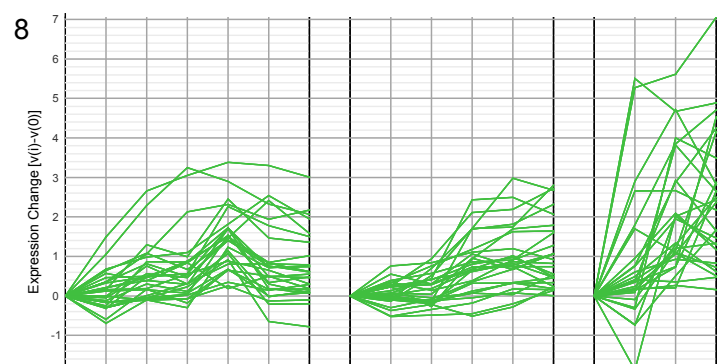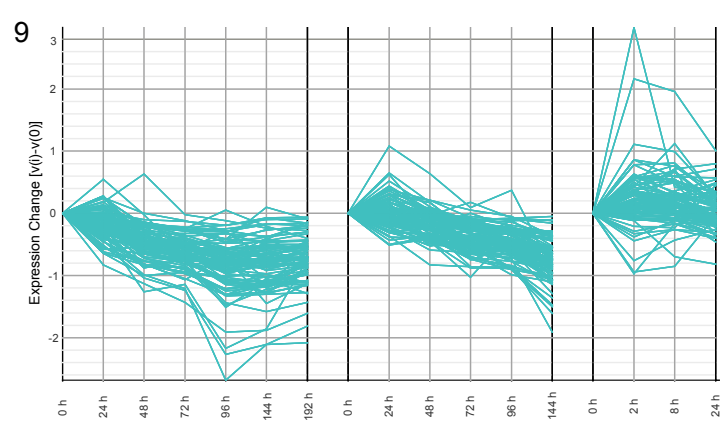

Supplement: 12864_2012_4990_MOESM6_ESM.pdf [file 12864_2012_4990_MOESM6_ESM.pdf]
