# Supplementary material for: Comparative analysis of fungal genomes reveals different plant cell wall degrading capacity in fungi
Source: Springer Nature journal article supplement (doi:10.1186/1471-2164-14-274), 2013-04-23

**A**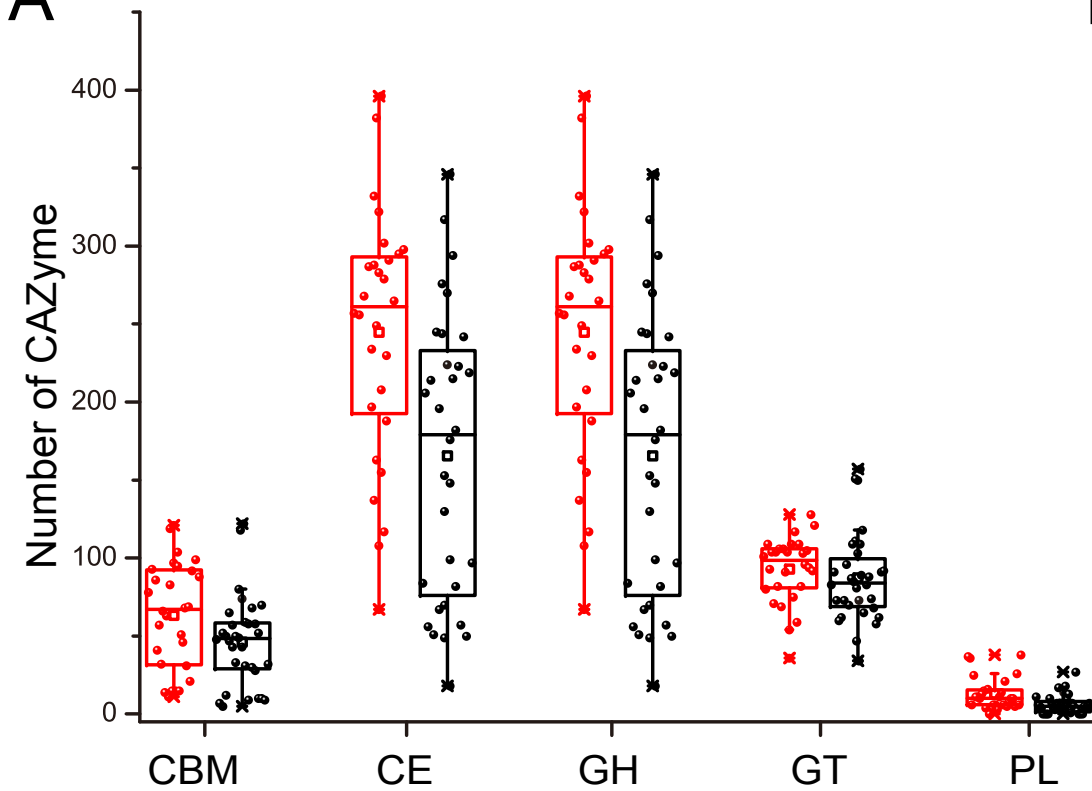**B**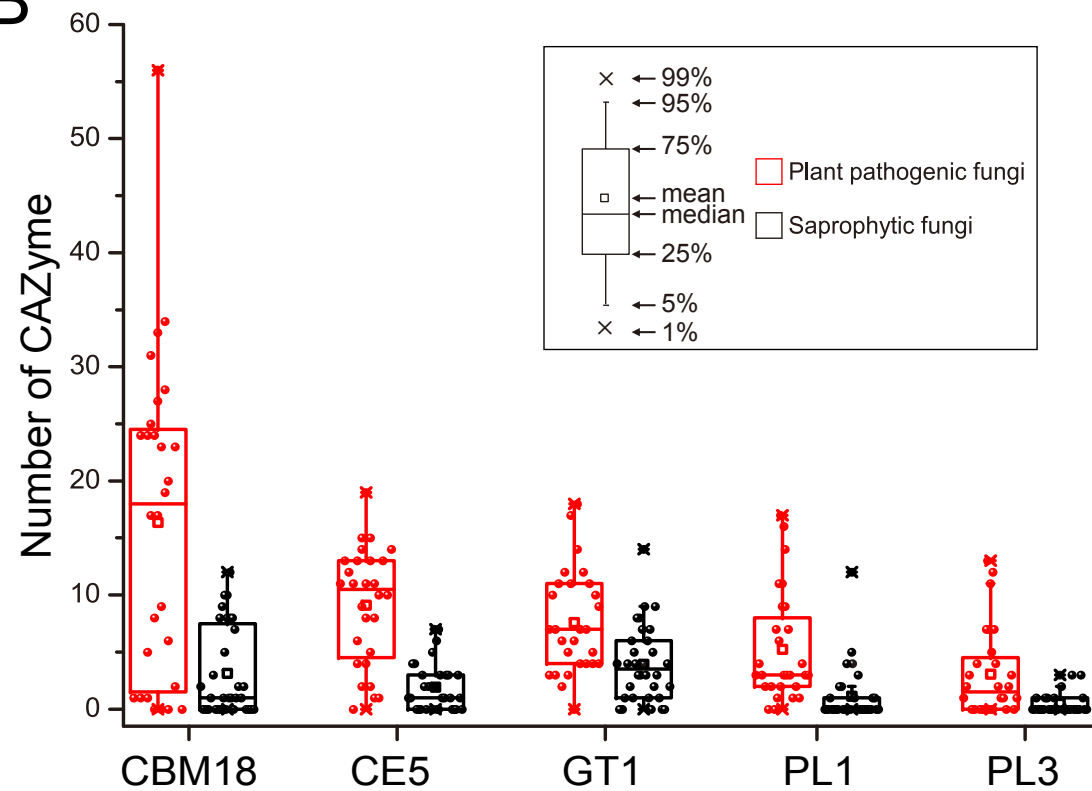

Supplement: 12864_2012_4990_MOESM14_ESM.pdf [file 12864_2012_4990_MOESM14_ESM.pdf]
